# Supplementary material
Source: PubMed Central journal article supplement (PMC7830408)

## Supporting Information:

### Neuropilin-1 Assists SARS-CoV-2 Infection by Stimulating Separation of Spike Protein Domains S1 and S2

Zhen-lu Li <sup>1</sup> and Matthias Buck <sup>1-4\*</sup>

<sup>1</sup>Department of Physiology and Biophysics, Case Western Reserve University, School of Medicine, 10900 Euclid Avenue, Cleveland, Ohio 44106, U. S. A. <sup>2</sup>Department of Pharmacology, <sup>3</sup>Department of Neurosciences, <sup>4</sup>Case Comprehensive Cancer Center, Case Western Reserve University, School of Medicine, 10900 Euclid Avenue, Cleveland, Ohio 44106, U. S. A.

E-mail corresponding authors: [matthias.buck@case.edu](mailto:matthias.buck@case.edu)

**Figure S1: Residues identified as wider interface (> 30% occupancy and less than 0.6 nm) distant to the other protein.** Typically, a cut-off of 0.4 nm cut off is used to judge the interaction between two amino acids (Table in Fig. 2b). In order to include the neighboring residues at the NR1P: SPIKE interfaces, we also used a cut-off of 0.6nm, yielding interface residues shown pictorially in aligned sequence segment bars for the two proteins.

**Nrp1 domains:** a2: res. 27-141, b1: res. 147-265, b2: res. 275-424.

**Spike protein S1:** N1: res. 1-19, N2: res. 20-38, N3: res. 58-90, N4: res. 210-220, N5: res. 293-318, RBD<sup>N</sup>: res. 318-330, RBD<sup>C</sup>: res. 525-541, C1: res. 602-610, C2: res. 621-626, C3: res. 631-644, C: res. 682-685, S2<sup>N</sup>: res. 689-691

|         | Nrp1 domains | Spike protein S1                                                             |
|---------|--------------|------------------------------------------------------------------------------|
| Model 1 | b1, b2       | N2, C2, C3, C                                                                |
| Model 2 | a2, b1       | N1, N2, N4, C                                                                |
| Model 3 | a2, b1       | N1, N2, N3, N4, RBD <sup>N</sup> , RBD <sup>C</sup> , C2, C, S2 <sup>N</sup> |
| Model 4 | a2, b1, b2   | N1, N2, N3, N4, C3, C                                                        |
| Model 5 | b1           | N3, N4, N5, C1, C, S2 <sup>N</sup>                                           |
| Model 6 | a2, b1       | N2, N3, N4, RBD <sup>C</sup> , C1, C2, C3, C, S2 <sup>N</sup>                |
| Model 7 | b1, b2       | N1, N2, N3, C2, C3, C                                                        |

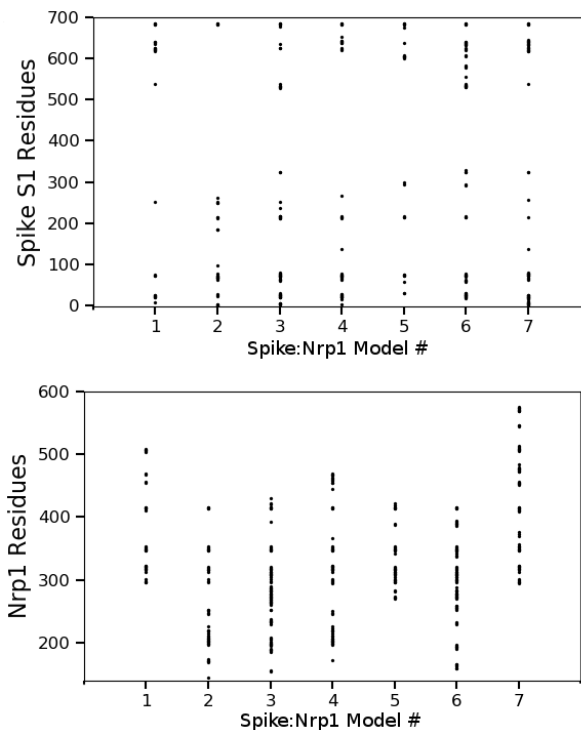

Supplement: media-1.pdf [file media-1.pdf]
